# Supplementary material
Source: PubMed Central journal article supplement (PMC6288073)
Supplement: joces-131-217638-s1.pdf [file joces-131-217638-s1.pdf]

| Vesicle Trafficking Regulator Genes     | RNAi lines | c306-Gal4 driven RNAi  |                                 | upd-Gal4 driven RNAi   |                                 |
|-----------------------------------------|------------|------------------------|---------------------------------|------------------------|---------------------------------|
|                                         |            | No border cell cluster | Incomplete BC cluster migration | No border cell cluster | Incomplete BC cluster migration |
| α-Snap (soluble NSF attachment protein) | KK107910   | lethal                 | -                               |                        |                                 |
|                                         | JF03266    | <b>46.4%</b> (n=97)    | ns                              | <b>88.3%</b> (n=120)   | ns                              |
|                                         | HMS00872   | 0% (n=38)              | 0%                              |                        |                                 |
|                                         | GD11986 *  | <b>22.7%</b> (n=88)    | 31.8%                           | <b>80.4%</b> (n=46)    | ns                              |
| Rab5                                    | JF03335    | 0% (n=22)              | 91%                             | 0% (n=104)             | ns                              |
|                                         | HMS00147   | 0% (n=64)              | ns                              |                        |                                 |
| Syntaxin 1A                             | JF01829 *  | <b>50%</b> (n=40)      | 35%                             | <b>50.6%</b> (n=89)    | 14.6%                           |
| Syntaxin 4                              | JF01714 *  | 0% (n=136)             | ns                              |                        |                                 |
|                                         | JF01460    | 0% (n=93)              | ns                              |                        |                                 |
|                                         | HMS02771   | 0% (n=86)              | ns                              |                        |                                 |
| Syntaxin 5                              | JF03330 *  | ns (n=67)              | 20.9%                           | 0% (n=72)              | 12.5%                           |
| Syntaxin 6                              | JF03125    | 0% (n=148)             | ns                              |                        |                                 |
| Syntaxin 7                              | JF02436 *  | 0% (n=65)              | 40%                             | 0% (n=48)              | 0%                              |
| Syntaxin 8                              | JF02038    | 0% (n=122)             | ns                              |                        |                                 |
| Syntaxin 13                             | HMS01723   | 0% (n=48)              | ns                              |                        |                                 |
|                                         | JF01920    | 0% (n=98)              | ns                              |                        |                                 |
| Syntaxin 16                             | JF01924    | 0% (n=174)             | ns                              | 0% (n=132)             | ns                              |
|                                         | HMC03430   | 0% (n=104)             | ns                              |                        |                                 |
| Syntaxin 17                             | JF01937 *  | 0% (n=52)              | 0%                              |                        |                                 |
| Syntaxin 18                             | JF02263 *  | 0% (n=87)              | ns                              |                        |                                 |
| NSF 1 (comatose)                        | HMS01261   | 0% (n=56)              | ns                              |                        |                                 |
|                                         | JF01459    | 0% (n=89)              | 0%                              |                        |                                 |
|                                         | JF01233    | 0% (n=65)              | ns                              | 0% (n=27)              | 0%                              |
| NSF2                                    | JF02765    | 0% (n=48)              | ns                              | lethal                 |                                 |
|                                         | HMS01262   | lethal                 | -                               | lethal                 |                                 |
| γ-Snap                                  | JF03124    | 0% (n=90)              | ns                              |                        |                                 |

**Table S1. Cell-type specific depletion of α-Snap or Syx1A leads to a failure of border cell specification, while depletion of other vesicle trafficking regulators leads to defects in border cell migration or normal, migrating border cells. The percent penetrance of**

the phenotype was scored in stage 10 egg chambers. Penetrance of the phenotype caused by *c306-* and *upd-Gal4* driven JF03266 *α-Snap* RNAi is the average of four and two independent experiments, respectively. Penetrance of the phenotype caused by *Syx1A* RNAi is the average of two independent experiments. While some *α-Snap* RNAi lines and *Syx1A* RNAi occasionally led to cell migration defects, the no-border-cells phenotype was more unusual; thus, this was our focus for further characterization. If the border cell migration defect was observed in less than 10% of stage 10 egg chambers, it was deemed not significant (ns) since control (*c306-Gal4*) egg chambers sometimes displayed defects to this extent. *Rab5* disruption was used as a positive control, which resulted in incomplete border cell migration (Assaker et al., 2010); however, border cell fate was not affected and *Rab5* depletion in polar cells yielded a wild-type phenotype. In all experiments flies were incubated overnight at 29°C. RNAi lines with an asterisk have been shown to cause mutant phenotypes in other tissues, which indicates they are functional (Mummery-Widmer et al., 2009, Schnorrer et al., 2010, Khuong et al., 2013, Meehan et al., 2015, Peng et al., 2015, Harris et al., 2016, Mauvezin et al., 2016).

**Assaker, G., D. Ramel, S. K. Wculek, M. Gonzalez-Gaitan and G. Emery (2010).** Spatial restriction of receptor tyrosine kinase activity through a polarized endocytic cycle controls border cell migration. *Proc Natl Acad Sci U S A* **107**(52): 22558-22563.

**Harris, K. P., Y. V. Zhang, Z. D. Piccioli, N. Perrimon and J. T. Littleton (2016).** The postsynaptic t-SNARE Syntaxin 4 controls traffic of Neuroligin 1 and Synaptotagmin 4 to regulate retrograde signaling. *Elife* **5**.

**Khuong, T. M., R. L. Habets, S. Kuenen, A. Witkowska, J. Kasprovicz, J. Swerts, R. Jahn, G. van den Bogaart and P. Verstreken (2013).** Synaptic PI(3,4,5)P3 is required for Syntaxin1A clustering and neurotransmitter release. *Neuron* **77**(6): 1097-1108.

**Mauvezin, C., A. L. Neisch, C. I. Ayala, J. Kim, A. Beltrame, C. R. Braden, M. K. Gardner, T. S. Hays and T. P. Neufeld** (2016). Coordination of autophagosome-lysosome fusion and transport by a Klp98A-Rab14 complex in *Drosophila*. *J Cell Sci* **129**(5): 971-982.

**Meehan, T. L., S. E. Kleinsorge, A. K. Timmons, J. D. Taylor and K. McCall** (2015). Polarization of the epithelial layer and apical localization of integrins are required for engulfment of apoptotic cells in the *Drosophila* ovary. *Dis Model Mech* **8**(12): 1603-1614.

**Mummery-Widmer, J. L., M. Yamazaki, T. Stoeger, M. Novatchkova, S. Bhalerao, D. Chen, G. Dietzl, B. J. Dickson and J. A. Knoblich** (2009). Genome-wide analysis of Notch signalling in *Drosophila* by transgenic RNAi. *Nature* **458**(7241): 987-992.

**Peng, Y., J. Lee, K. Rowland, Y. Wen, H. Hua, N. Carlson, S. Lavania, J. Z. Parrish and M. D. Kim** (2015). Regulation of dendrite growth and maintenance by exocytosis. *J Cell Sci* **128**(23): 4279-4292.

**Schnorrer, F., C. Schonbauer, C. C. Langer, G. Dietzl, M. Novatchkova, K. Schernhuber, M. Fellner, A. Azaryan, M. Radolf, A. Stark, K. Keleman and B. J. Dickson** (2010). Systematic genetic analysis of muscle morphogenesis and function in *Drosophila*. *Nature* **464**(7286): 287-291.

| Gene                                              | RNAi line | <i>tub</i> -Gal4 driven RNAi in embryos |                                                                   | c306-Gal4 driven RNAi |                                                                        |
|---------------------------------------------------|-----------|-----------------------------------------|-------------------------------------------------------------------|-----------------------|------------------------------------------------------------------------|
|                                                   |           | Fold change                             | Primers                                                           | Single RNAi           | Interaction tests                                                      |
| <i>α-Snap</i><br>(soluble NSF attachment protein) | KK107910  |                                         |                                                                   | lethal                |                                                                        |
|                                                   | JF03266   | <b>0.19</b>                             | <i>α-snap</i> ex1-2;<br><i>α-snap</i> ex2-3;<br><i>α-snap</i> FRP |                       | Lethal with JF01233<br>HMS01261,<br>(NSF RNAi),<br>JF02765 (NSF2 RNAi) |
|                                                   | GD11986   |                                         |                                                                   |                       | Lethal with JF02765,<br>HMS01262 (NSF2 RNAi)                           |
| NSF<br>( <i>comatose</i> )                        | HMS01261  | <b>0.31</b>                             | <i>comt</i> set2;<br><i>comt</i> ex4-6                            |                       | Lethal with JF02765<br>(NSF2 RNAi)                                     |
|                                                   | JF01459   |                                         |                                                                   |                       |                                                                        |
|                                                   | JF01233   |                                         |                                                                   |                       |                                                                        |
| NSF2                                              | JF02765   | <b>0.02</b>                             | NSF2 ex2-3<br>NSF2 ex3-4                                          |                       | Lethal with HMS01261<br>(NSF RNAi)                                     |
|                                                   | HMS01262  | <b>0.09</b>                             | NSF2 ex2-3<br>NSF2 ex3-4                                          | lethal at 25°         |                                                                        |

**Table S2. Verification of functional RNA interference.** To test knockdown efficiency, *tub*-Gal4 females were crossed to males from the indicated RNAi lines. Total RNA was collected from F1 embryos and assayed by qRT-PCR in triplicates. Fold changes are represented as averages of two or four experiments. Endogenous ovarian expression of *α-Snap*, *NSF*, and *NSF2* mRNAs was verified using the same primer sets. For interaction tests, RNAi lines were balanced and combined as indicated, then males carrying two RNAi insertions were crossed to c306-Gal4 females.

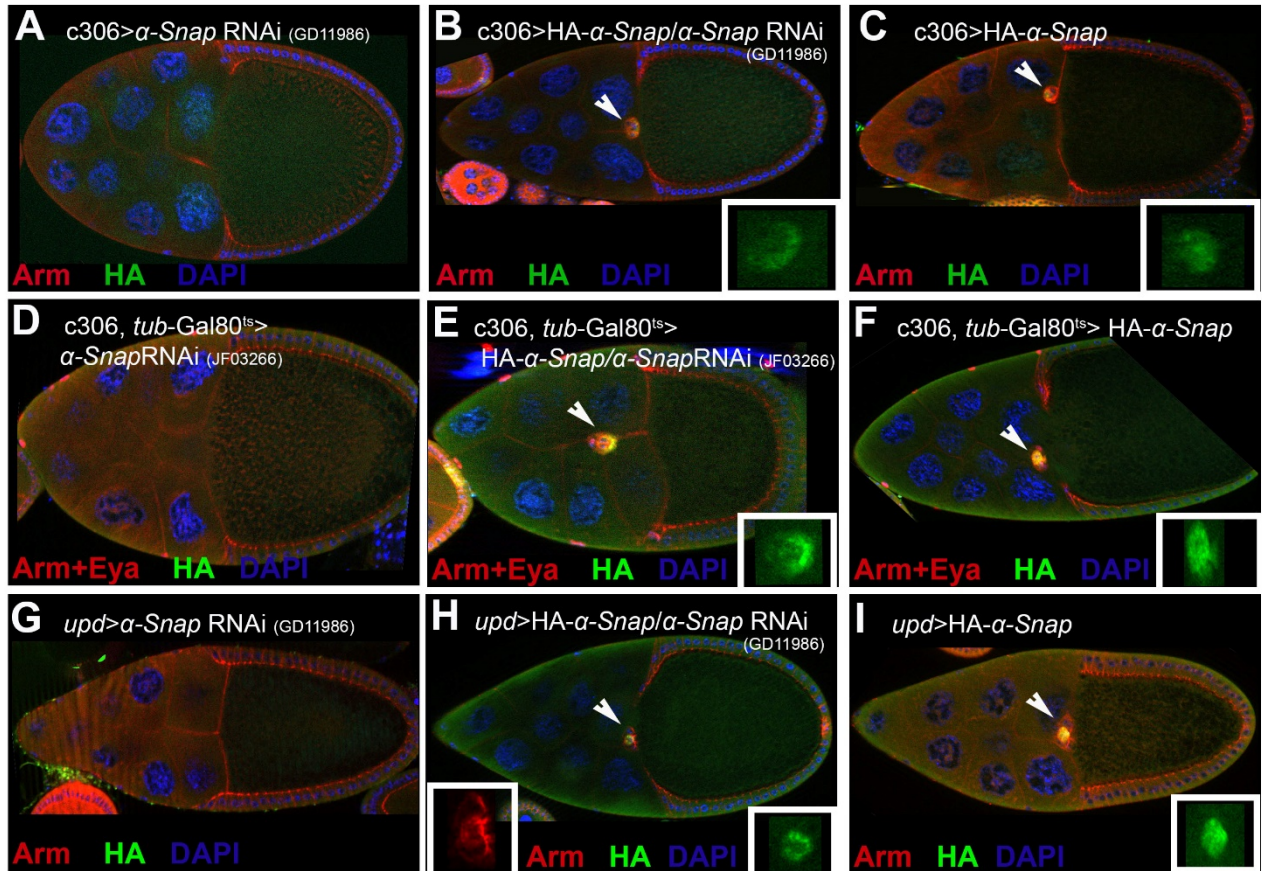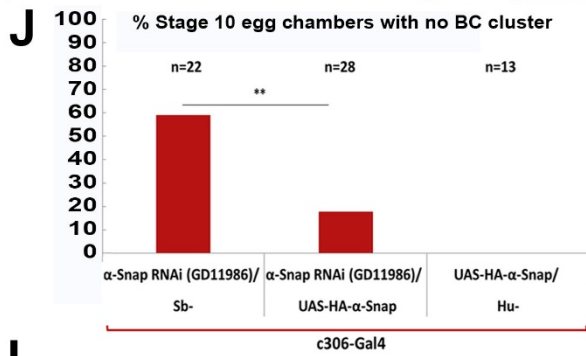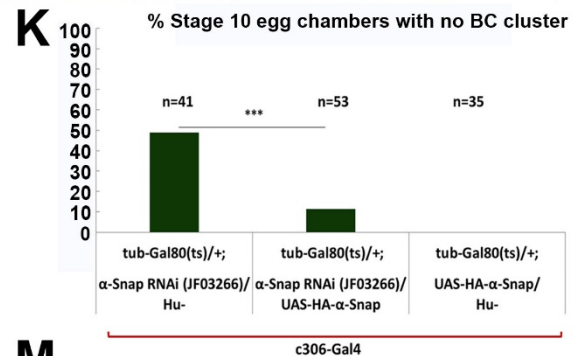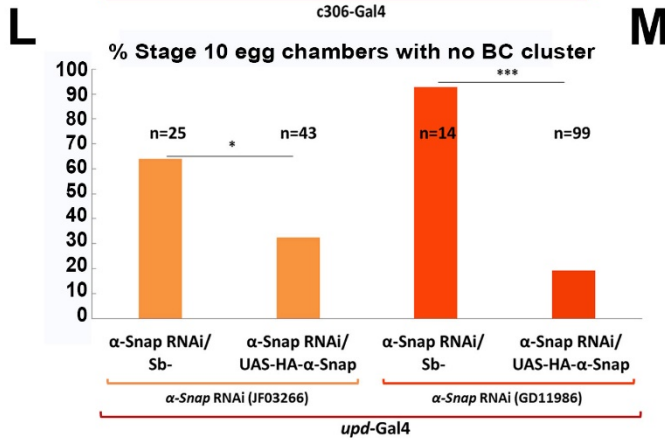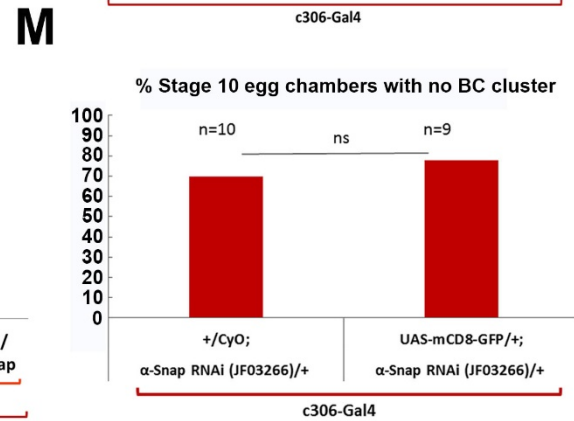

**Figure S1.  $\alpha$ -Snap is required in the anterior follicle cells to induce border cell fate.**

Depletion of  $\alpha$ -Snap in the anterior follicle cells (A&D) and in polar cells (G) leads to egg chambers that lack the border cell cluster. c306- and *upd*-Gal4-driven expression of HA-tagged  $\alpha$ -Snap in the depleted egg chambers rescues the lack of a border cell cluster phenotype caused by the RNAi (B, E&H, arrowheads, insets; border cells are marked by HA expression (green) and Arm (red), and DAPI stain (blue). Over-expression of  $\alpha$ -Snap alone in the control egg chambers (c306-Gal4, c306-Gal4; *tub*-Gal80 (ts) and *upd*-Gal4) does not affect border cell specification (C, F&I). (J-M) Comparison of the penetrance of the no border cell (BC) cluster phenotype caused by  $\alpha$ -Snap RNAi to that caused by the RNAi plus expression of HA-tagged  $\alpha$ -Snap in the anterior follicle cells (J&K) and polar cells (L). The presence of a second UAS in the genome (UAS-GFP), which might dilute out the concentration of Gal4, does not lead to suppression of the phenotype caused by  $\alpha$ -Snap RNAi (M). \*indicates  $p < 0.05$ , \*\* $p < 0.005$ , \*\*\* $p < 0.0005$  significance value by two-tailed Fisher's exact test. Not significant change is shown as ns. Genotypes with no bar did not have any cases of the no border cell cluster phenotype. (A-C) and (J) flies were incubated at 29°C for 20 hours prior to dissection. (D-F) and (K) flies were incubated at 31°C (non-permissive temperature for Gal80<sup>ts</sup>) for 54 hours prior to dissection. (G-I) and (L) flies were incubated at 29°C for 45 hours (for the JF03266 RNAi line (L)) and for 26 hours (for the GD11986 RNAi line (G-I & L)) prior to dissection. (M) flies were incubated at 29°C for 48 hours prior to dissection.



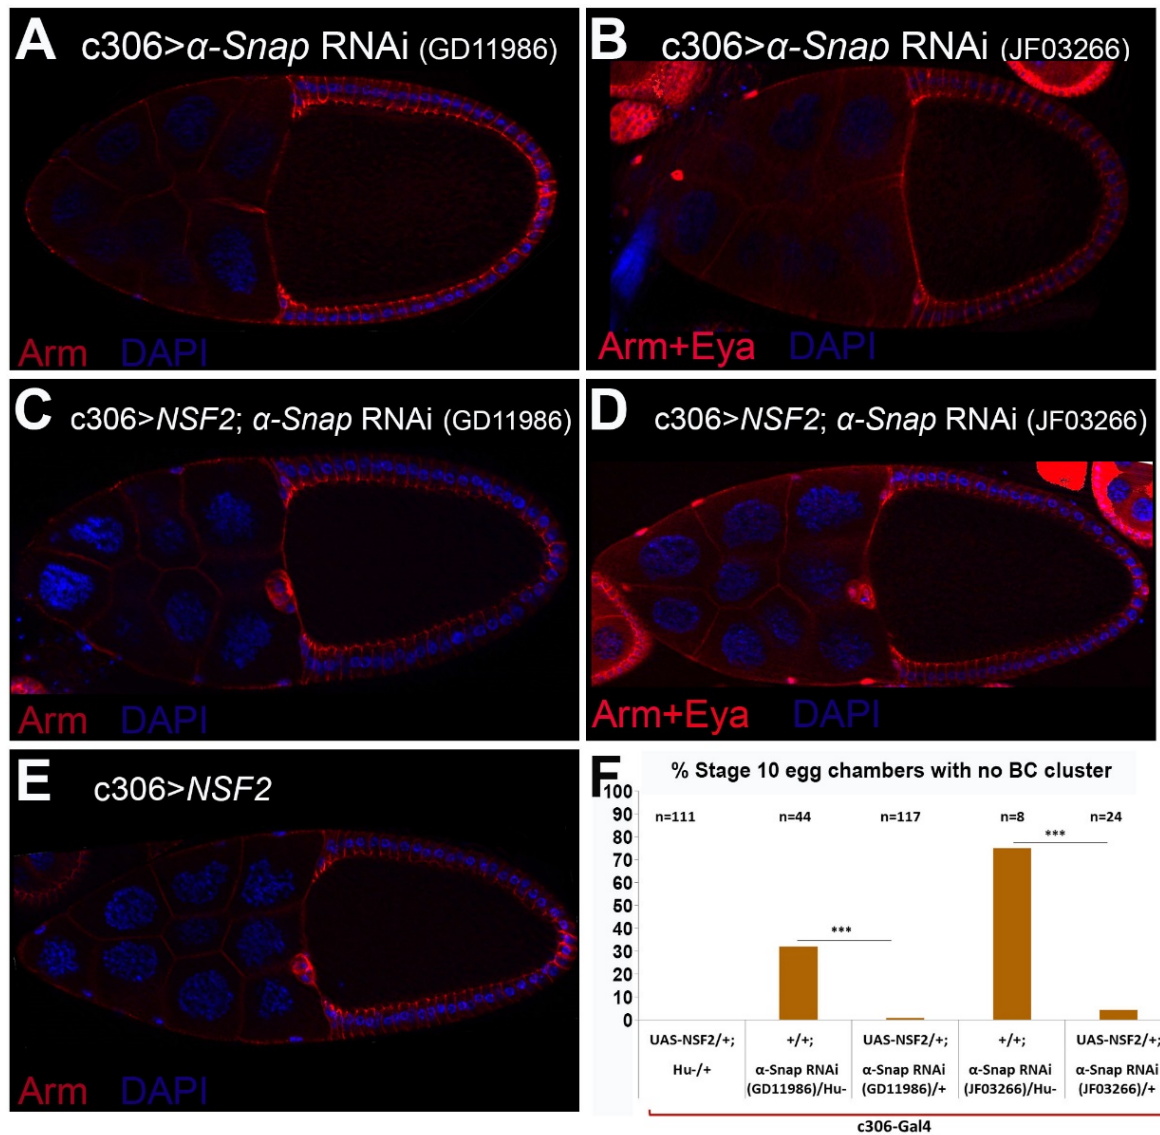

**Figure S2. NSF2 and  $\alpha$ -Snap function together to regulate border cell specification.** (A-B) *c306*-Gal4-driven depletion of  $\alpha$ -Snap using either the GD11986 (A) or JF03266 (B) RNAi line results in egg chambers that lack a border cell cluster. (C-E) Over-expression of *NSF2* using *c306*-Gal4 rescues the phenotype caused by  $\alpha$ -Snap RNAi (C-D), while overexpression of *NSF2* alone yields a wild-type phenotype (E). (F) The penetrance of the phenotype caused by  $\alpha$ -Snap RNAi is significantly reduced upon over-expression of *NSF2*. \*\*\*indicates  $p < 0.0005$  significance value by two-tailed Fisher's exact test. Flies bearing JF03266 RNAi and the ones additionally expressing *NSF2* (*c306*-Gal4; UAS-*NSF2*;  $\alpha$ -Snap RNAi (JF03266) flies) were incubated at 29°C for 24-48 hours prior to dissection.

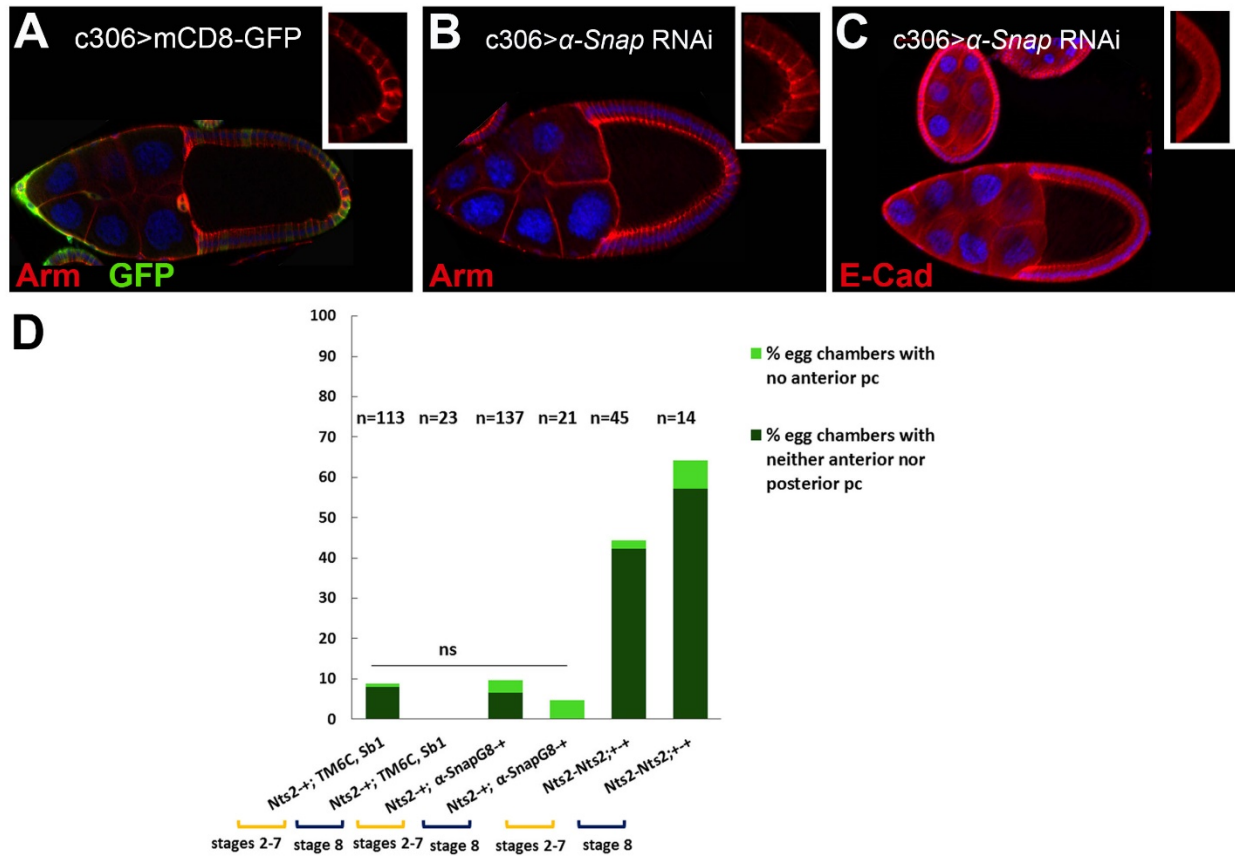

**Figure S3.  $\alpha$ -Snap does not affect trafficking of all cell surface molecules.** (A-C) In egg chambers with  $\alpha$ -Snap depletion, cell-surface adhesion molecule complexes are properly localized. *c306*-Gal4 drives membrane-tethered GFP expression (green) in the anterior and posterior follicle cells (A). Arm (A,B, red) and E-Cad (C, red) localization patterns in the posterior follicle cells appear normal in a *c306*-Gal4-driven  $\alpha$ -Snap RNAi egg chamber. Insets in (A-C) are magnified views of posterior follicle in the control and in the  $\alpha$ -Snap depleted egg chambers. (D)  $\alpha$ -Snap and Notch (*N*) do not genetically interact during polar cell specification. Penetrance of stages 2-8 egg chambers that lack either only the anterior or both the anterior and the posterior polar cells (pc) in the *N*<sup>*ts2*</sup>/+ heterozygous, *N*<sup>*ts2*</sup>/+;  $\alpha$ -Snap<sup>G8/+</sup> double heterozygous or *N*<sup>*ts2*</sup>/*N*<sup>*ts2*</sup> homozygous flies. Two-tailed Fisher's exact test was run to calculate the statistical significance. All flies were incubated at 29°C (non-permissive temperature for *ts2* allele of *N*) for 116 hours.



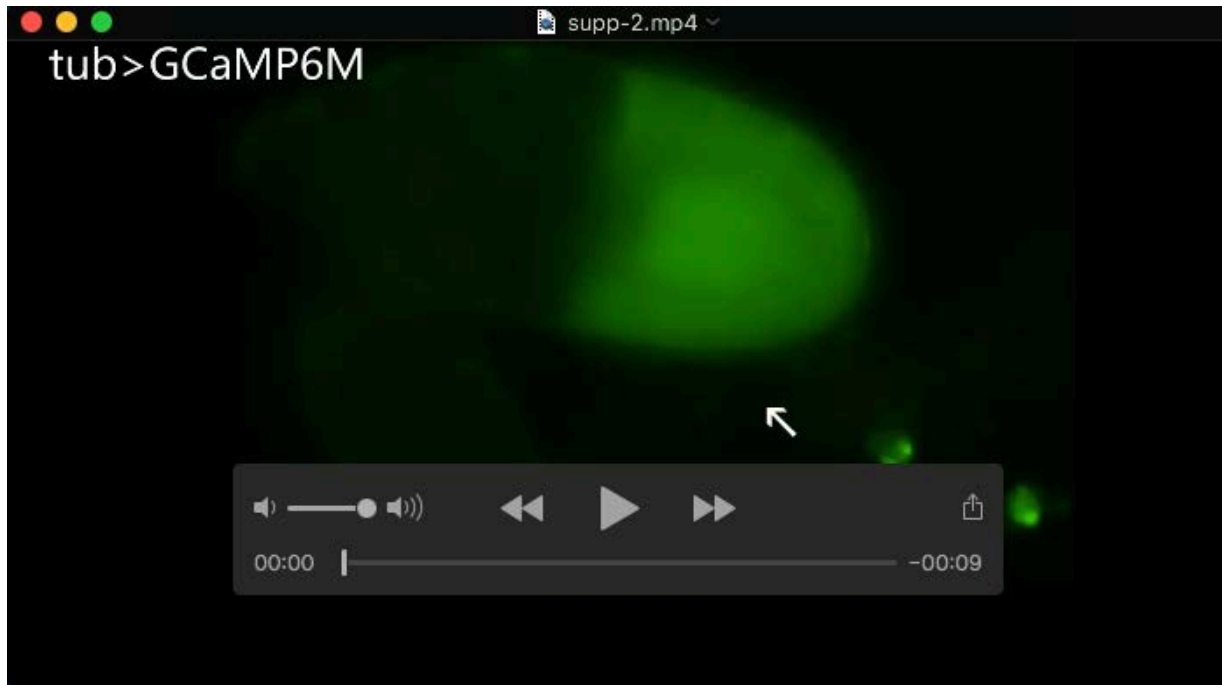

**Movie 1: Transient GFP fluorescence in a polar cell prior to border cell specification in a *tub-Gal4>UAS-GCaMP6m* egg chamber.** A 7:20 (seven minute, twenty second) portion of a 40 minute-long time lapse movie. Images were captured every 10 seconds with a 1 second exposure time. Pulses are seen in the stage 6/7 egg chamber.

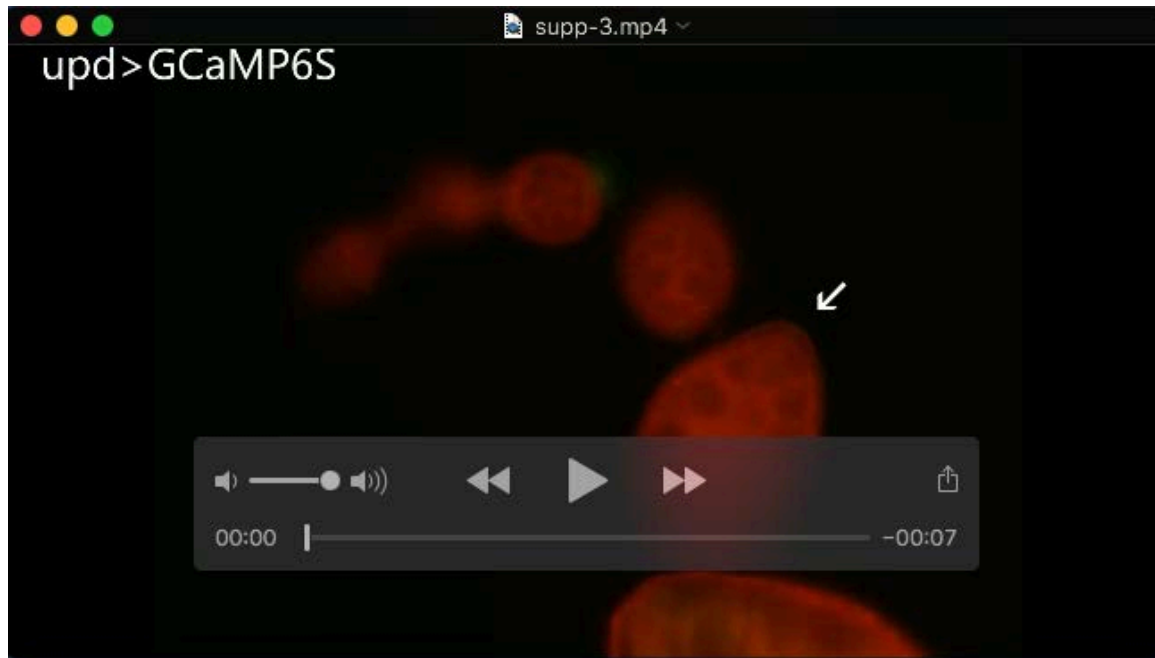

**Movie 2: Transient GFP fluorescence in polar cells in a stage seven *upd-Gal4>UAS-GCaMP6s* egg chamber.** An 11 minute portion of an hour-long time lapse movie. Images were capture every 20 seconds, with a 1.24second exposure time; red shows FM4-64 marking the cell membranes. A pulse is seen in the stage 8 egg chamber.

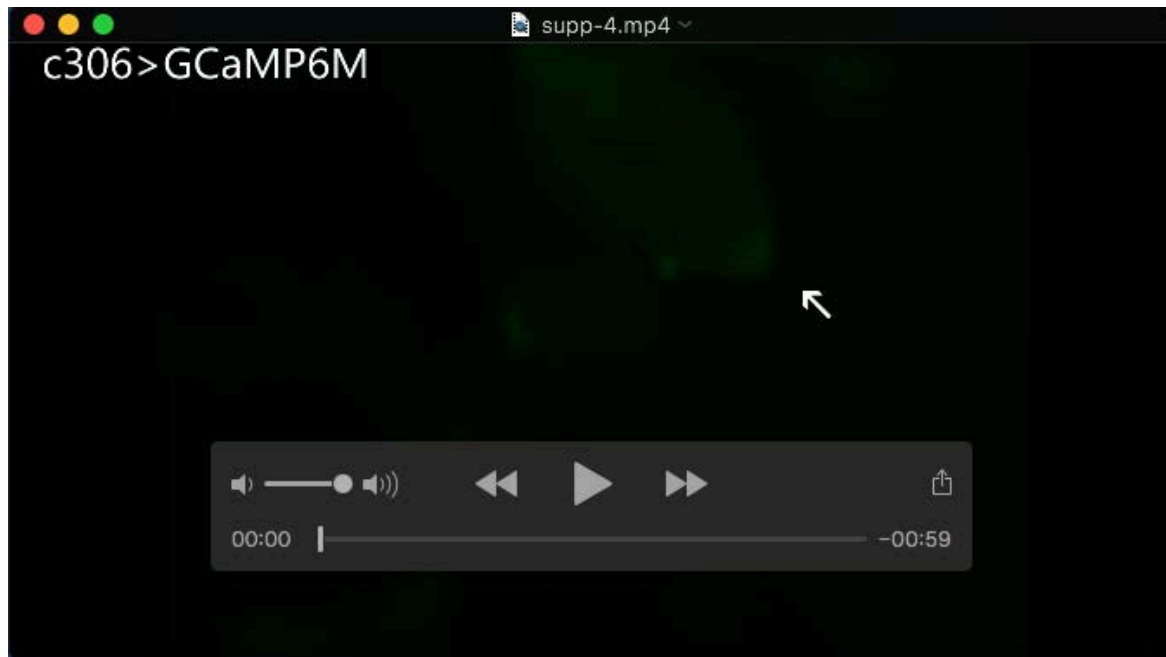

**Movie 3: Periodic GFP fluorescence in polar cells prior to border cell specification in a c306-Gal4-UAS-GCaMP6m egg chamber.** A 1 h, 37 min, 20 s (01:37:20) portion of a two hour-long time lapse movie. Images were captured every 20 second with a 1 second exposure time in the green channel. Pulses are seen in the anterior of the stage 7/8 egg chamber and the posterior of the younger egg chamber.
